# Supplementary material for: Depressive disorders are associated with increased peripheral blood cell deformability: A cross-sectional case-control study (Mood-Morph)
Source: bioRxiv or medRxiv preprint supplement (doi:10.1101/2021.07.01.21259846), 2021-07-06
Supplement: Supplementary file [file media-1.pdf]

**Depressive disorders are associated with increased peripheral blood cell deformability: A cross-sectional case-control study (Mood-Morph)**

Walther, A.<sup>1,2,†</sup>, Mackens-Kiani, A.<sup>1</sup>, Eder, J.<sup>1</sup>, Herbig, M.<sup>3,4</sup>, Herold, C.<sup>3,5</sup>, Kirschbaum, C.<sup>1</sup>, Guck, J.<sup>3,4</sup>, Wittwer, L.D.<sup>4,6</sup>, Beesdo-Baum, K.<sup>7</sup>, Kräter, M.<sup>3,4</sup>

<sup>1</sup>Biopsychology, TU Dresden, Dresden, Germany

<sup>2</sup>Clinical Psychology and Psychotherapy, University of Zurich, Zurich, Switzerland

<sup>3</sup>Center for Molecular and Cellular Bioengineering, Biotechnology Center, TU Dresden, Dresden, Germany

<sup>4</sup>Max Planck Institute for the Science of Light & Max-Planck-Zentrum für Physik und Medizin, Erlangen, Germany

<sup>5</sup>Zellmechanik Dresden GmbH, Dresden, Germany

<sup>6</sup>Faculty of Informatics/Mathematics, HTW Dresden, Dresden, Germany

<sup>7</sup>Behavioral Epidemiology, TU Dresden, Dresden, Germany

<sup>†</sup>Corresponding author

**Correspondence:** Dr. A. Walther: [a.walther@psychologie.uzh.ch](mailto:a.walther@psychologie.uzh.ch)

# Supplementary Material

Supplementary Table 1. Mean cell area size comparisons according to different diagnostic groups

|                       | Erythrocytes | Monocytes | Neutrophils | Lymphocytes | Granulo-Monocytes | Thrombocytes |
|-----------------------|--------------|-----------|-------------|-------------|-------------------|--------------|
| <b>LTPDD (n = 30)</b> |              |           |             |             |                   |              |
| M                     | 40.9390      | 66.1913   | 67.7062     | 37.6273     | 67.7894           | 5.6540       |
| SD                    | 1.2461       | 2.3062    | 1.1810      | 1.2022      | 1.1940            | 0.8728       |
| <b>HC (n = 30)</b>    |              |           |             |             |                   |              |
| M                     | 40.8469      | 66.0337   | 67.6605     | 37.9806     | 67.7738           | 5.5787       |
| SD                    | 1.9207       | 2.6292    | 1.2462      | 1.7160      | 1.2085            | 6.8770       |
| <i>t</i> -value       | - 0.220      | - 0.247   | - 0.146     | 0.924       | - 0.050           | - 0.333      |
| <i>p</i> -value       | 0.4135       | 0.403     | 0.4425      | 0.180       | 0.480             | 0.3700       |
| <b>CPDD (n = 15)</b>  |              |           |             |             |                   |              |
| M                     | 40.7275      | 65.9237   | 67.7512     | 37.5837     | 67.9206           | 5.6507       |
| SD                    | 1.1010       | 2.5406    | 1.2405      | 1.2379      | 1.1676            | 1.1016       |
| <b>HC (n = 15)</b>    |              |           |             |             |                   |              |
| M                     | 40.7029      | 66.4452   | 67.9298     | 37.8058     | 68.0457           | 5.4427       |
| SD                    | 1.2413       | 3.0257    | 1.4592      | 2.1836      | 1.4232            | 0.5773       |
| <i>t</i> -value       | - 0.057      | 0.511     | 0.361       | 0.343       | 0.263             | - 0.648      |
| <i>p</i> -value       | 0.4775       | 0.3065    | 0.3605      | 0.367       | 0.397             | 0.2615       |
| <b>LTMDD (n = 42)</b> |              |           |             |             |                   |              |
| M                     | 41.0876      | 66.4817   | 68.0362     | 37.8409     | 68.0979           | 5.4017       |
| SD                    | 1.4583       | 2.2434    | 1.5556      | 1.1895      | 1.4886            | 0.6913       |
| <b>HC (n = 42)</b>    |              |           |             |             |                   |              |
| M                     | 40.7902      | 66.2198   | 67.9257     | 37.7184     | 68.1101           | 5.5390       |
| SD                    | 1.5475       | 2.3655    | 1.5385      | 1.5029      | 1.4816            | 0.9077       |
| <i>t</i> -value       | - 0.906      | - 0.521   | - 0.327     | - 0.414     | 0.038             | 0.780        |
| <i>p</i> -value       | 0.1835       | 0.302     | 0.372       | 0.34        | 0.485             | 0.2185       |
| <b>CMDD (n = 12)</b>  |              |           |             |             |                   |              |
| M                     | 40.7546      | 65.8923   | 67.5383     | 37.5598     | 67.6076           | 5.1817       |
| SD                    | 1.4692       | 1.9439    | 1.1775      | 1.3376      | 1.0862            | 0.8033       |
| <b>HC (n = 12)</b>    |              |           |             |             |                   |              |
| M                     | 41.0904      | 65.8106   | 67.6602     | 37.9470     | 67.7980           | 5.5175       |
| SD                    | 1.4585       | 2.6542    | 1.7148      | 1.2257      | 1.7581            | 0.6739       |
| <i>t</i> -value       | 0.562        | - 0.086   | 0.203       | 0.739       | 0.319             | 1.109        |
| <i>p</i> -value       | 0.29         | 0.466     | 0.4205      | 0.234       | 0.3765            | 0.1395       |

Note: LTPDD: lifetime persistent depressive disorder, CPDD: current persistent depressive disorder, LTMDD: lifetime major depressive disorder, CMDD: current major depressive disorder, Mean area size ( $\mu\text{m}^2$ ), \* indicates  $p < 0.05$  (one-tailed)
